# Supplementary material
Source: publisher figshare collection journal article supplement (https://acs.figshare.com/ndownloader/files/31701328)
Supplement: Supplementary file 1 [file 31701328]

## ***Supporting Information***

### **Using platelet-rich plasma hydrogel to deliver mesenchymal stem cells into three-dimensional PLGA scaffold for cartilage tissue engineering**

*Ying Tang<sup>1</sup>, Huaping Wang<sup>1</sup>, Yilin Sun<sup>1</sup>, Yang Jiang<sup>5</sup>, Sha Fang<sup>1</sup>, Ze Kan<sup>1</sup>, Yingxi*

*Lu<sup>3</sup>, Shenghou Liu<sup>4,\*</sup>, Xianfeng Zhou<sup>1,\*</sup>, Zhibo Li<sup>2,\*</sup>.*

<sup>1</sup> Key Lab of Biobased Polymer Materials, Shandong Provincial Education Department, College of Polymer Science and Engineering, Qingdao University of Science and Technology, Qingdao, 266042, China;

<sup>2</sup> College of Chemical Engineering, Qingdao University of Science and Technology, Qingdao, 266042, China;

<sup>3</sup> College of Materials Science and Engineering, Qingdao University of Science and Technology, Qingdao, 266042, China;

<sup>4</sup> Department of Orthopaedics, the Second Hospital, Cheeloo College of Medicine, Shandong University, Jinan, 250033, China;

<sup>5</sup> Hematology Department, The Second Hospital, Cheeloo College of Medicine, Shandong University, Jinan, 250033, China.

\* To whom correspondence should be addressed.

E-mail: [xinying5475@sina.com](mailto:xinying5475@sina.com); [xianfeng@uakron.edu](mailto:xianfeng@uakron.edu); [zbli@qust.edu.cn](mailto:zbli@qust.edu.cn)

Phone: +86-532-84022950

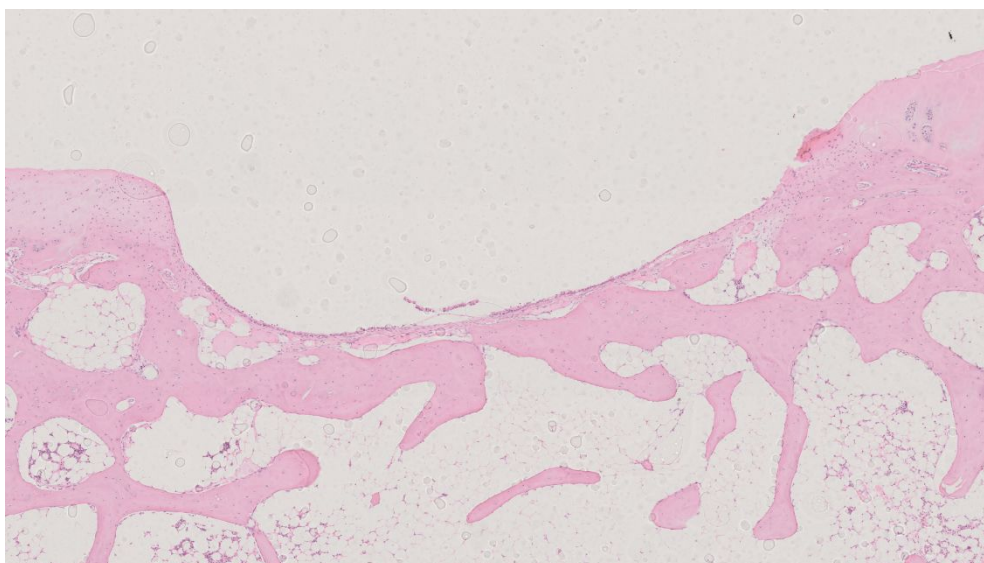

**Figure S1.** H&E staining indicates that there is no obvious inflammatory cell infiltration in the defect area after the scaffold is absorbed.

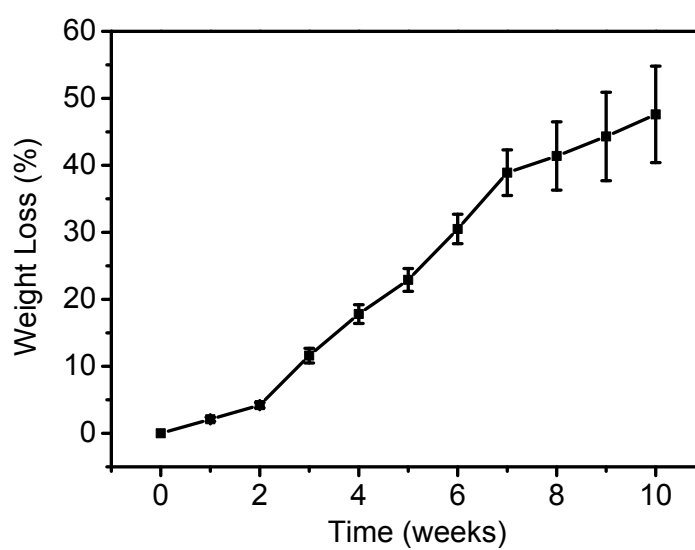

**Figure S2.** Weight loss of the PLGA 3D-printing scaffold as a function of immersion time in PBS (pH 7.4).
